# Supplementary material
Source: MDPI journal article supplement (https://www.mdpi.com/2073-4395/12/6/1304)
Supplement: s1 [file s1 › agronomy-1703827-supplementary.pdf]

# Supplemental Materials: Temporal response of bacterial community associated Fe(III) reduction to initial pH shift of paddy soils

## Supplementary legends

Text 1. Illustration for selection of pH regulator

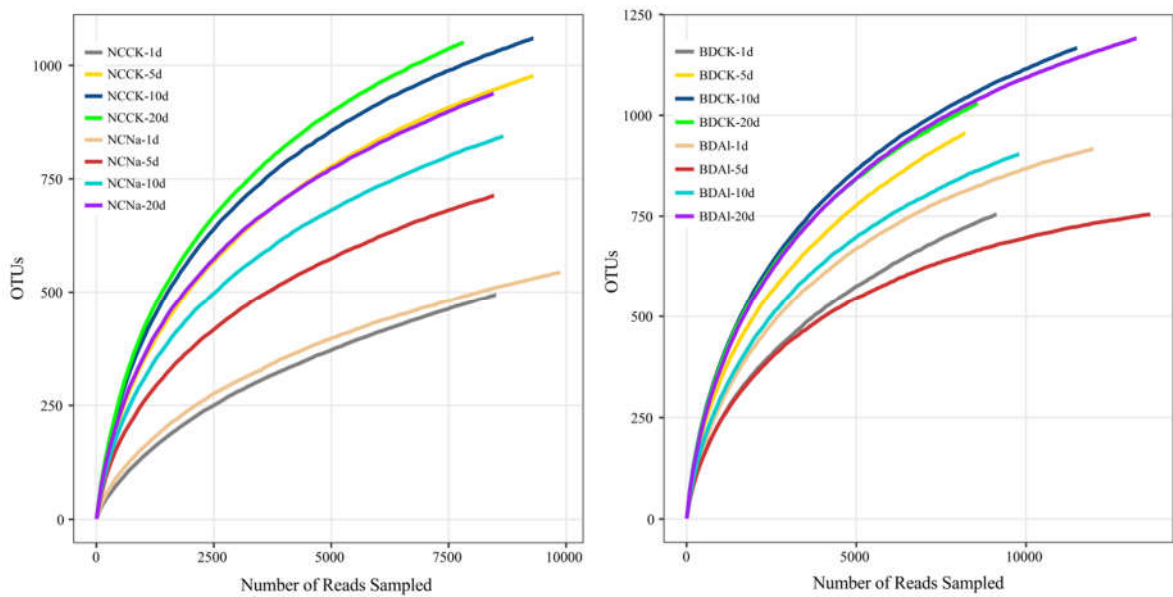

**Figure S1** The rarefaction curves of tested samples. (NCCK, the original NC soil without pH adjustment; NCNa, NC soil with pH adjustment by sodium carbonate to alkaline level; BDCK, the original BD soil without pH adjustment; BDAI, BD soil with pH adjustment by aluminum sulfate to acidic level. Numbers following the treatments represented the flooding time, the same below).

Table S1. Soil physicochemical characteristics of tested paddy soil

| Soils | Texture    | Classification                   | pH        | Amorphous Fe<br>(mg g <sup>-1</sup> ) | Free Fe<br>(mg g <sup>-1</sup> ) | Organic<br>Matter<br>(mg g <sup>-1</sup> ) | Available<br>Phosphorus<br>(mg kg <sup>-1</sup> ) | Available<br>Potassium<br>(mg kg <sup>-1</sup> ) | Nitrate<br>Nitrogen<br>(mg kg <sup>-1</sup> ) | Ammoniacal<br>Nitrogen<br>(mg kg <sup>-1</sup> ) |
|-------|------------|----------------------------------|-----------|---------------------------------------|----------------------------------|--------------------------------------------|---------------------------------------------------|--------------------------------------------------|-----------------------------------------------|--------------------------------------------------|
| NC    | Clay loam  | Fe-accumuli-Stagnic<br>Anthrosol | 5.17±0.02 | 3.62±0.04                             | 13.88±0.16                       | 47.89±5.07                                 | 5.77±0.16                                         | 114.43±2.72                                      | 5.26±0.04                                     | 37.67±0.47                                       |
| BD    | Silty clay | Hapli-Stagnic<br>Anthropol       | 7.89±0.05 | 3.55±0.02                             | 14.49±0.05                       | 33.48±2.23                                 | 13.89±1.44                                        | 302.41±3.14                                      | 5.92±0.14                                     | 12.13±0.15                                       |

Note: NC, paddy soil taken from the drained post-harvest paddy fields in Nanchang county, Jiangxi Province (28°19'48" N, 115°33'36" E); BD, paddy soil taken from the drained post-harvest paddy fields in Baodi district, Tianjin Municipality (39°38'24" N, 117°33'36"E).

**Table S2.** Potential Fe(III)-reducing bacteria in paddy soils with different initial pH according to references and sequences published in NCBI

| OTU     | Reference sequences (GenBank accession No.)                      | Sequence identity |
|---------|------------------------------------------------------------------|-------------------|
| OTU2402 | <i>Geobacter bemidjiensis</i> strain Bem (NR_042769)             | 99%               |
| OTU437  | <i>Geobacter bemidjiensis</i> strain Bem (NR_025895)             | 98%               |
| OTU2547 | <i>Geobacter picheringii</i> strain G13 (NR_043576)              | 98%               |
| OTU745  | <i>Geobacter picheringii</i> strain G13 (NR_026077)              | 97%               |
| OTU2752 | <i>Desulfuromonas carbonis</i> strain ICBM (KJ776405)            | 97%               |
| OTU2540 | <i>Desulfuromonas</i> sp. enrichment culture clone TF (KF242419) | 98%               |
| OTU965  | <i>Anaeromyxobacter</i> sp. Fac12 (AJ504438)                     | 97%               |
| OTU2781 | <i>Anaeromyxobacter</i> sp. clone 90D-58 (AJ504437)              | 97%               |
| OTU1221 | <i>Anaeromyxobacter dehalogenans</i> strain JpR-4-2 (EF067314)   | 97%               |
| OTU2628 | <i>Anaeromyxobacter</i> sp. Fw109-5 (CP000769)                   | 97%               |
| OTU511  | <i>Anaeromyxobacter</i> sp. Fw109-5 (CP000769)                   | 98%               |
| OTU1063 | <i>Rhizomicrobium palustre</i> strain A48 (NR_112186)            | 98%               |
| OTU1271 | <i>Pseudomonas</i> sp. RPS18 (MN841948)                          | 97%               |
| OTU2893 | <i>Pseudomonas</i> sp. RPS33 (MN841963)                          | 97%               |
| OTU2001 | <i>Pseudomonas</i> sp. RPS33 (MN841963)                          | 99%               |
| OTU1756 | <i>Citrobacter</i> sp. LAR-1 (KC211014)                          | 98%               |
| OTU124  | <i>Rhodoferrax_ferrireducens</i> T118 (NR_114646)                | 98%               |
| OTU2711 | <i>Rhodoferrax_ferrireducens</i> T118 (NR_114646)                | 97%               |
| OTU1929 | <i>Rhodoferrax_ferrireducens</i> T118 (NR_114646)                | 97%               |
| OTU177  | <i>Massilia</i> sp. RPS4 (MN841936)                              | 98%               |
| OTU558  | <i>Massilia</i> sp. RPS16 (MN841947)                             | 99%               |
| OTU1357 | <i>Bacillus</i> sp. PeC11 (AM177061)                             | 98%               |
| OTU1700 | <i>Bacillus</i> sp. RPS23 (MN841953)                             | 98%               |
| OTU1109 | <i>Bacillus</i> sp. RPS28 (MN841958)                             | 98%               |
| OTU186  | <i>Bacillus infernus</i> strain TH-23 (NR_027227)                | 97%               |
| OTU742  | <i>Bacillus</i> sp. RPS27 (MN841957)                             | 97%               |
| OTU2736 | <i>Bacillus subterraneus</i> strain COOI3B (NR_115305)           | 97%               |
| OTU2979 | <i>Bacterium</i> _HN1-10-1 (JN117981)                            | 98%               |
| OTU1965 | <i>Bacillus</i> sp. RPS34 (MN841964)                             | 97%               |
| OTU1490 | <i>Bacillus</i> sp. RPS34 (MN841964)                             | 97%               |
| OTU1338 | <i>Bacillus</i> sp. RPS34 (MN841964)                             | 100%              |
| OTU916  | <i>Bacillus</i> sp. RPS14 (MN841945)                             | 97%               |
| OTU488  | <i>Bacillus</i> sp. RPS14 (MN841945)                             | 97%               |
| OTU651  | <i>Bacillus</i> sp. RPS14 (MN841945)                             | 99%               |
| OTU1526 | <i>Bacterium</i> _HN2-10-21 (JN118088)                           | 97%               |
| OTU2671 | <i>Enterococcus gallinarum</i> (AF277567)                        | 97%               |
| OTU872  | <i>Lysinibacillus</i> sp. strain A66 (MN853551)                  | 98%               |
| OTU2020 | <i>Solibacillus</i> sp. strain A20 (MN853550)                    | 99%               |
| OTU322  | <i>Paenibacillus</i> sp. RPS42 (MN841972)                        | 97%               |
| OTU1550 | <i>Paenibacillus</i> sp. strain Cam9 (HE861860)                  | 98%               |

| OTU     | Reference sequences (GenBank accession No.)                          | Sequence identity |
|---------|----------------------------------------------------------------------|-------------------|
| OTU817  | <i>Paenibacillus guangzhouensis</i> strain GSS02 ((NR_134114)        | 99%               |
| OTU46   | <i>Paenibacillus guangzhouensis</i> strain GSS02 (NR_134114)         | 97%               |
| OTU1691 | <i>Clostridium</i> sp. strain P74 (MN853540)                         | 99%               |
| OTU733  | <i>Clostridium</i> sp. strain P74 (MN853540)                         | 97%               |
| OTU1005 | <i>Clostridium</i> sp. strain P74 (MN853540)                         | 97%               |
| OTU1975 | Bacterium_HN1-10-42 (JN118006)                                       | 97%               |
| OTU372  | <i>Clostridium</i> sp. RPS6 (MN841938)                               | 97%               |
| OTU1537 | <i>Clostridium</i> sp. RPS6 (MN841938)                               | 97%               |
| OTU719  | <i>Clostridium</i> sp. RPS6 (MN841938)                               | 98%               |
| OTU997  | <i>Clostridium</i> sp. C71 (N223392)                                 | 99%               |
| OTU857  | <i>Fervidicella metallireducens</i> strain AeB (NR_104504)           | 97%               |
| OTU1589 | <i>Geosporobacter</i> sp. IRF9 (KF601937)                            | 98%               |
| OTU2692 | <i>Anaerobaculum carbohydroliticum</i> strain IRF19 (KF601947)       | 100%              |
| OTU2485 | <i>Alkaliphilus peptidofragmentans</i> strain Z-7036 (EF382660)      | 99%               |
| OTU884  | <i>Desulfosporosinus lacus</i> strain STP12 (NR_042202)              | 98%               |
| OTU903  | <i>Desulfosporosinus lacus</i> strain STP12 (NR_042202)              | 98%               |
| OTU357  | <i>Desulfitobacterium metallireducens</i> strain 853-15 (NR_025125)  | 97%               |
| OTU525  | <i>Desulfitobacterium metallireducens</i> strain 853-15 (NR_025125)  | 99%               |
| OTU2406 | <i>Desulfitobacterium aromaticivorans</i> strain UKTL (NR_116427)    | 99%               |
| OTU2437 | <i>Desulfosporomusa polytropica</i> strain STP3 (NR_114691)          | 98%               |
| OTU703  | <i>Desulfosporomusa polytropica</i> strain STP3 (NR_114691)          | 97%               |
| OTU2148 | Iron-reducing bacterium enrichment culture clone HN51 (FJ269060)     | 100%              |
| OTU2615 | Iron-reducing bacterium enrichment culture clone FEA_2_C2 (FJ802294) | 99%               |
| OTU995  | Iron-reducing bacterium enrichment culture clone HN3 (FJ269045)      | 97%               |
| OTU1768 | Iron-reducing bacterium enrichment culture clone HN3 (FJ269045)      | 100%              |
| OTU1432 | Iron-reducing bacterium enrichment culture clone HN-HFO75 (FJ269060) | 99%               |
| OTU1438 | Iron-reducing bacterium enrichment culture clone HN-HFO91 (FJ269102) | 98%               |
| OTU2319 | Iron-reducing bacterium enrichment culture clone HN66 (FJ269063)     | 100%              |
| OTU901  | <i>Pelosinus fermentans</i> strain R7 (NR_043577)                    | 98%               |
| OTU3013 | <i>Azotobacter</i> sp. strain C2 (MN853543)                          | 100%              |

---

## Text 2. Selection of pH regulator

Dissolved aluminum and iron in soil were widely accepted to play critical role in the biogeochemical process of soil acidification and formation [1]. Carbonate was the driving force for soil alkaline as the hydrolysis of carbonate could result in the increase of soil pH [1,2]. Therefore, we used aluminum sulfate to decrease the soil initial pH and sodium carbonate to increase soil pH in the present study [3-5]. Other alternative regulator like phosphate buffer was not used because of its inhibition on the solubility of Fe-oxides [6]. HCl-NaOH buffer was also discarded to avoid the destruction on soil structure and organism [7]. However, there was still a certain amount of sulfate input when amended with aluminum sulfate, which was considered as alternative electron competitor with Fe(III) [8]. Studies have confirmed the ferrous sulfide (FeS) was the initial product of sulfate reduction and subsequently converted to either pyrite (FeS<sub>2</sub>) or O-coordinated ferrous species [9,10]. In the present study, the acid-soluble total iron on the 40 d of incubation was decreased by 0.787 mg g<sup>-1</sup> with addition of Al<sub>2</sub>(SO<sub>4</sub>)<sub>3</sub>, illustrating the formation of insoluble FeS or FeS<sub>2</sub> [11](Lefort Mucci, & Sundby, 2012; Kwon et al. 2014). We calculated that no more than 4.62% of the remarkable inhibition of pH shift on Fe(III) reduction with Al<sub>2</sub>(SO<sub>4</sub>)<sub>3</sub> was caused by SO<sub>4</sub><sup>2-</sup> input, while the remaining 10.91% was attributed to soil pH decrease to acidic by Al<sup>3+</sup>. Whereas iron in FeS or FeS<sub>2</sub> was still in a ferrous state in spite of inhibition of sulfate on Fe(III) reduction. It implied that sulfate inhibition might be less significant than the theoretical estimates. Additionally, Wu (2013) amended BD soil with similar amount of SO<sub>4</sub><sup>2-</sup> input to our study in the form of Na<sub>2</sub>SO<sub>4</sub> and demonstrated similar inhibitory effect on Fe(III) reduction [12]. This indirectly indicated that the input of Na<sup>+</sup> showed limited influence on Fe(III) reduction.

## References

- 1 McBride, M. (1994). Environmental chemistry of soils. Oxford Univ Press, New York.
- 2 Kögel-Knabner, I.; Amelung, W.; Cao, Z.H.; Fiedler, S.; Frenzel, P.; Jahn, R.; Kalbitz, K.; Kölbl, A.; Schloter, M. Biogeochemistry of paddy soils. *Geoderma*. 2010, 157, 1-14. reducers, sulfate reducers, and methanogens in anoxic paddy soil. *Biology and Fertility of Soils*. 1995, 19: 65-72.
- 3 Jia, R.; Li, L.N.; Qu, D. pH shift-mediated dehydrogenation and hydrogen production are responsible for microbial iron(III) reduction in submerged paddy soils. *J Soil Sediment*. 2015, 15, 1178-1190.
- 4 Laura, R.D. Effects of alkali salts on carbon and nitrogen mineralization of organic matter in soil. *Plant Soil*. 1976, 44, 587-596.
- 5 Nicol, G.W.; Webster, G.; Glover, L.A.; Prosser, J.I. Differential response of archaeal and bacterial communities to nitrogen inputs and pH changes in upland pasture rhizosphere soil. *Environ Microbiol*. 2004, 6, 861-867.
- 6 Li, Q.. Enrichment of phosphate on ferrous iron phases during bio-reduction of ferrihydrite. *International Journal of Geosciences*. 2012, 3: 314-320.
- 7 Grybos, M.; Davranche, M.; Gruau, G.; Petitjean, P.; Pédrot, M. Increasing pH drives organic matter solubilization from wetland soils under reducing conditions. *Geoderma*. 2009, 154, 13-19.
- 8 Achtnich, C.; Bak, F.; Conrad, R. Competition for electron donors among nitrate reducers, ferric iron reducers, sulfate reducers, and methanogens in anoxic paddy soil. *Biol Fert Soils*. 1995, 19: 65-72.
- 9 Ponnampetuma, F.N. The chemistry of submerged soils. In: *Advances in agronomy*. 1972, 24, 29-96.
- 10 Kwon, M.J.; Boyanov, M.I.; Antonopoulos, D.A.; Brulc, J.M.; Johnston, E.R.; Skinner, K.A.; Kemner, K.M.; O'Loughlin, E.J. Effects of dissimilatory sulfate reduction on Fe(III) (hydr)oxide reduction and microbial community development. *Geochimica et Cosmochimica Acta*. 2014, 129: 177-190.
- 11 Lefort, S.; Mucci, A.; Sundby, B. Sediment response to 25 years of persistent hypoxia. *Aquatic Geochemistry*. 2012, 18:461-474.
- 12 Wu, C. Influence of initial pH value on microbial iron reduction in paddy soils (in Chinese), Northwest A&F university, China: Yangling. 2013, p67
